# Supplementary material
Source: Springer Nature journal article supplement (https://www.springermedizin.de/resource/supplementary/12888_2013_1555_MOESM2_ESM.pdf/9481334)

**IDENTIFICATION**

Records identified in Jan 2013 search

(n = 3516)

Records identified in July 2013 search

(n = 2430)

**SCREENING**

Records screened

(n = 5946)

Records excluded

(n = 5921)

**ELIGIBILITY**

Full-text articles assessed  
for eligibility

(n = 25)

Full-text articles excluded

(n = 7)

**INCLUDED**

Studies included in quantitative  
synthesis (meta-analysis)

(n = 18)

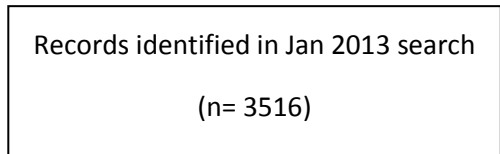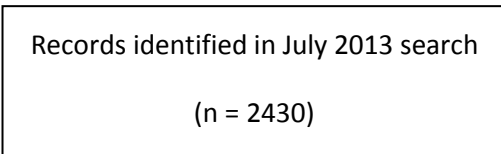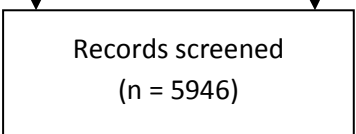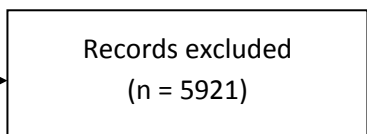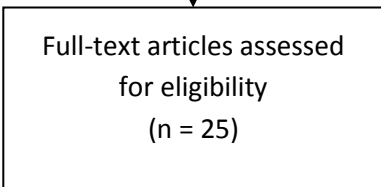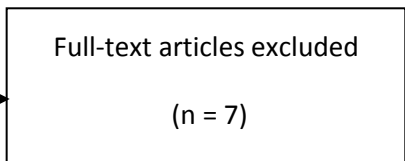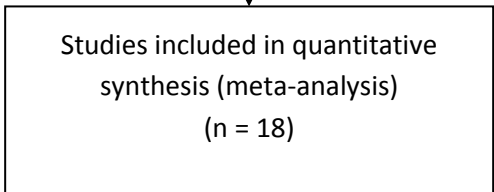

Supplement: MOESM2 [file 9481334]
